# Supplementary material for: CNT-functionalized electrospun fiber mat for a stretchable moisture-driven power generator
Source: Royal Society of Chemistry journal article supplement (doi:10.1039/d2tc04654g), 2023-01-01
Supplement: d2tc04654g1.pdf [file d2tc04654g1.pdf]

## Electronic Supplementary Information

# CNT-functionalized Electrospun Fiber Mat for Stretchable Moisture-driven Power Generator

*Paniz Faramarzi<sup>a,b, ‡</sup>, Byeunggon Kim<sup>c, ‡</sup>, Jae Bem You<sup>b,c,\*</sup>, Soo-Hwan Jeong<sup>a,c,\*</sup>*

<sup>a</sup> Department of Hydrogen & Renewable Energy, Kyungpook National University, Daegu 41566, Republic of Korea

<sup>b</sup> KNU Institute for Nanophotonics Applications (KINPA), Kyungpook National University, Daegu 41566, Republic of Korea

<sup>c</sup> Department of Chemical Engineering, Kyungpook National University, Daegu 41566, Republic of Korea

\* Corresponding authors

Email: Jae Bem You([jb.you@knu.ac.kr](mailto:jb.you@knu.ac.kr)); Soo-Hwan Jeong ([shjeong@knu.ac.kr](mailto:shjeong@knu.ac.kr))

<sup>‡</sup> These authors contributed equally to this work

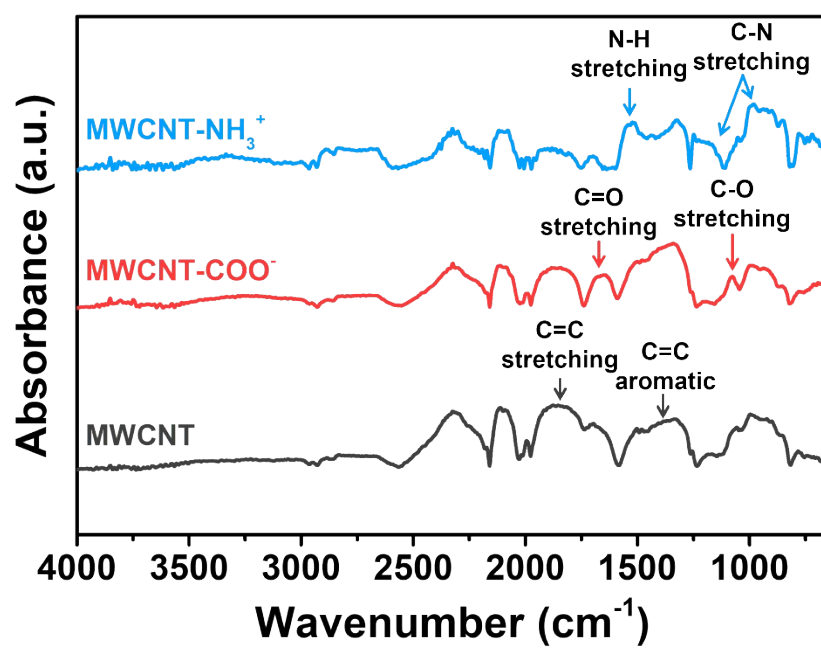

**Figure S1.** FT-IR spectrum of MWCNT, MWCNT-COO<sup>-</sup>, and MWCNT-NH<sub>3</sub><sup>+</sup>.

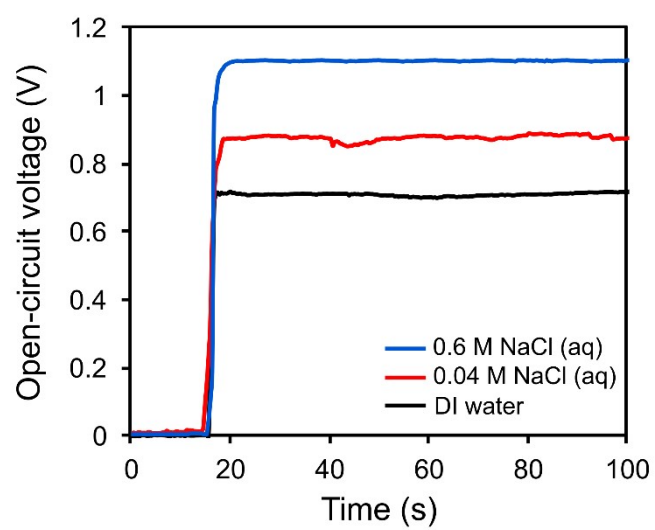

**Figure S2.**  $V_{OC}$  of MPG dipped in DI water, 0.04 M and 0.6 M NaCl aqueous solutions

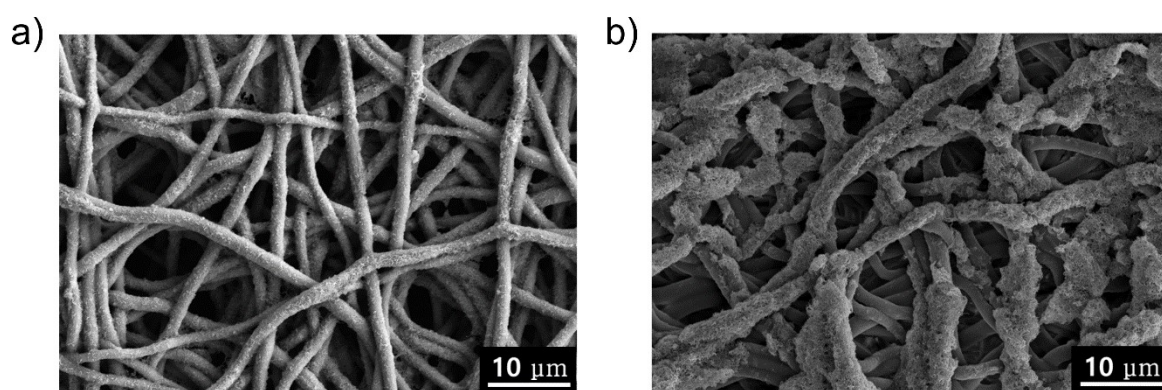

**Figure S3.** SEM images of MPG (a) before and (b) after applying 60% strain

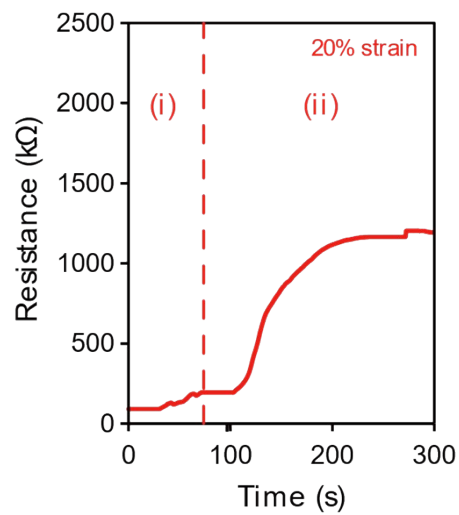

**Figure S4.** Resistance changes of MPG with 20% applied strain. Resistance increases slightly during stretching (region i) and increases further when water is added.

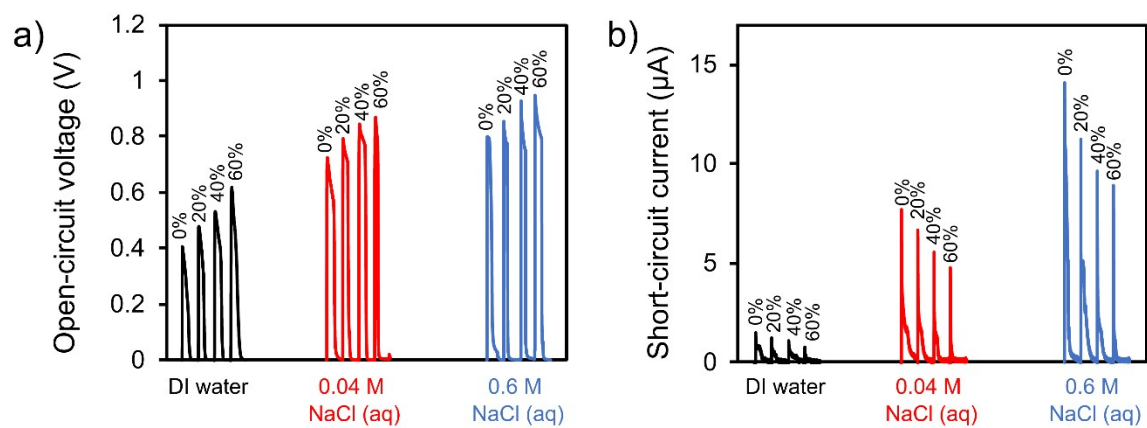

**Figure S5.** (a)  $V_{OC}$  and (b)  $I_{SC}$  of stretchable MPGs after undergoing 0%, 20%, 40%, 60% strain tested with DI water, 0.04 M NaCl (aq) and 0.6 M NaCl (aq).

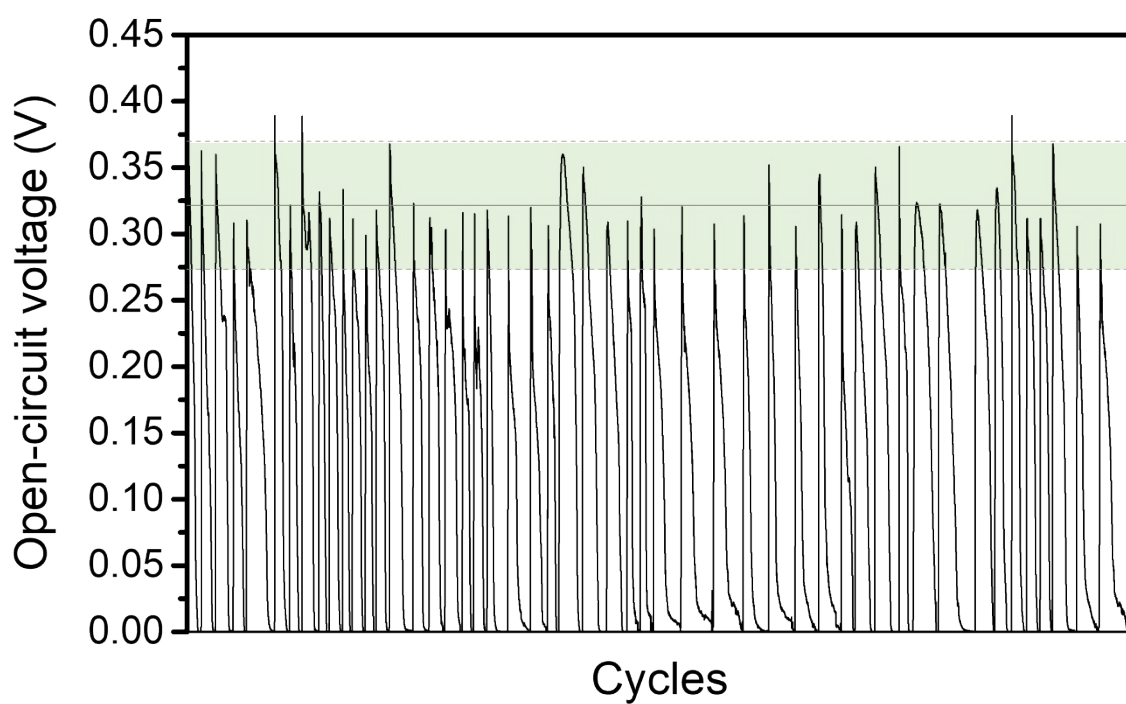

**Figure S6.**  $V_{OC}$  of the MPG with 5  $\mu\text{L}$  of DI water for 50 cycles. The  $V_{OC}$  of MPG with 0% strain was conducted with 5  $\mu\text{L}$  of DI water. Similar max.  $V_{OC}$  were measured throughout the 50 cycles ( $322 \pm 48$  mV).
